# Supplementary material for: A Portable Biodevice to Monitor Salivary Conductivity for the Rapid Assessment of Fluid Status
Source: MDPI journal article supplement (doi:10.3390/jpm11060577), 2021-06-19
Supplement: s1 [file s1]

## Supplemental Material

**Table S1.** Different parameters for the evaluation of body fluid status in normal status.

| Variables                                      | Male (N=10)            | Female (N=10)          | P value |
|------------------------------------------------|------------------------|------------------------|---------|
| Salivary conductivity, $\mu\text{s}/\text{cm}$ | 3263.49 $\pm$ 467.62   | 3262.79 $\pm$ 1589.46  | 0.096   |
| Serum osmolality, mOsm/kgH <sub>2</sub> O      | 292.60 $\pm$ 2.59      | 288.10 $\pm$ 4.15      | 0.007** |
| Urine Osmolality, mOsm/kgH <sub>2</sub> O      | 544.90<br>$\pm$ 250.47 | 359.00<br>$\pm$ 209.07 | 0.070   |
| Urine SG                                       | 1.015<br>$\pm$ 0.007   | 1.009<br>$\pm$ 0.006   | 0.069   |
| Thirst intensity CS                            | 3.60 $\pm$ 1.17        | 3.40 $\pm$ 1.42        | 0.785   |
| Thirst intensity VAS                           | 3.75 $\pm$ 1.89        | 3.82 $\pm$ 2.34        | 0.821   |
| Serum copeptin, pg/mL                          | 198.89 $\pm$ 78.08     | 244.25 $\pm$ 99.03     | 0.496   |
| FeNa, %                                        | 0.93 $\pm$ 0.48        | 0.91 $\pm$ 0.44        | 0.940   |

Note: Values are shown as the mean $\pm$  standard deviation (SD). Abbreviations: FeNa: fractional excretion of sodium. Thirst intensity CS: thirst intensity categorical scale. Thirst intensity VAS: thirst intensity visual analog scale. Urine SG: urine specific gravity. Note: \*P < 0.05, \*\*P < 0.01, \*\*\*P<0.001.

**Table S2.** Different parameters for the evaluation of body fluid status in water restriction.

| Variables                                      | Male (N=10)            | Female (N=10)          | P value |
|------------------------------------------------|------------------------|------------------------|---------|
| Salivary conductivity, $\mu\text{s}/\text{cm}$ | 3867.96 $\pm$ 1133.77  | 3474.93 $\pm$ 1216.11  | 0.364   |
| Serum osmolality, mOsm/kgH <sub>2</sub> O      | 294.80 $\pm$ 2.74      | 291.70 $\pm$ 5.12      | 0.129   |
| Urine Osmolality, mOsm/kgH <sub>2</sub> O      | 831.10<br>$\pm$ 150.86 | 744.50<br>$\pm$ 239.83 | 0.450   |
| Urine SG                                       | 1.024<br>$\pm$ 0.004   | 1.021<br>$\pm$ 0.006   | 0.239   |
| Thirst intensity CS                            | 5.60 $\pm$ 0.70        | 6.00 $\pm$ 0.47        | 0.118   |
| Thirst intensity VAS                           | 7.85 $\pm$ 1.62        | 8.37 $\pm$ 0.83        | 0.570   |
| Serum copeptin, pg/mL                          | 219.46 $\pm$ 81.69     | 289.17 $\pm$ 108.43    | 0.112   |
| FeNa, %                                        | 0.37 $\pm$ 0.18        | 0.40 $\pm$ 0.23        | 0.940   |

Note: Values are shown as the mean $\pm$  standard deviation (SD). Abbreviations: FeNa: fractional excretion of sodium. Thirst intensity CS: thirst intensity categorical scale. Thirst intensity VAS: thirst intensity visual analog scale. Urine SG: urine specific gravity. Note: \*P < 0.05, \*\*P < 0.01, \*\*\*P<0.001.

**Table S3.** Different parameters for the evaluation of body fluid status in rehydration status.

| Variables                                      | Male (N=10)           | Female (N=10)          | P value |
|------------------------------------------------|-----------------------|------------------------|---------|
| Salivary conductivity, $\mu\text{s}/\text{cm}$ | 3201.82 $\pm$ 897.66  | 2960.20 $\pm$ 902.13   | 0.140   |
| Serum osmolality, mOsm/kgH <sub>2</sub> O      | 289.80 $\pm$ 1.69     | 285.20 $\pm$ 7.87      | 0.139   |
| Urine Osmolality, mOsm/kgH <sub>2</sub> O      | 110.40<br>$\pm$ 69.04 | 128.00<br>$\pm$ 130.89 | 0.880   |
| Urine SG                                       | 1.003<br>$\pm$ 0.002  | 1.004<br>$\pm$ 0.004   | 0.691   |
| Thirst intensity CS                            | 2.30 $\pm$ 1.64       | 1.90 $\pm$ 0.99        | 0.749   |
| Thirst intensity VAS                           | 2.53 $\pm$ 2.63       | 1.56 $\pm$ 1.38        | 0.596   |
| Serum copeptin, pg/mL                          | 239.00 $\pm$ 98.74    | 274.48 $\pm$ 101.70    | 0.623   |
| FeNa, %                                        | 0.63 $\pm$ 0.23       | 0.48 $\pm$ 0.10        | 0.112   |

Note: Values are shown as the mean $\pm$  standard deviation (SD). Abbreviations: FeNa: fractional excretion of sodium. Thirst intensity CS: thirst intensity categorical scale. Thirst intensity VAS: thirst intensity visual analog scale. Urine SG: urine specific gravity. Note: \*P < 0.05, \*\*P < 0.01, \*\*\*P<0.001.
